# Supplementary material for: Atmospheric observations of Arctic Ocean methane emissions up to 82° north
Source: Springer Nature journal article supplement (doi:10.1038/ngeo1452), 2012-04-20
Supplement: 41561_2012_BFngeo1452_MOESM191_ESM.pdf [file 41561_2012_BFngeo1452_MOESM191_ESM.pdf]

Supplementary Information for “Atmospheric observations of Arctic Ocean methane emissions up to 82° north”

FigureS1.pdf: Flight tracks for 5 Arctic flights in fall, winter, and spring over fractional sea ice coverage. 2.7 MB

FigureS2.pdf: Multi-species correlations. 201 KB

FigureS3.pdf: CH<sub>4</sub>:O<sub>3</sub> relations. 127 KB

FigureS4.pdf: Time-series of methane and water vapor observations at 79.6N. 168 KB

FigureS5.pdf: 1-hz observations from profile at 82N on April 15, 2010 (fig. 3d). 418 KB

FigureS6.pdf: Meteorological parameters. 205KB

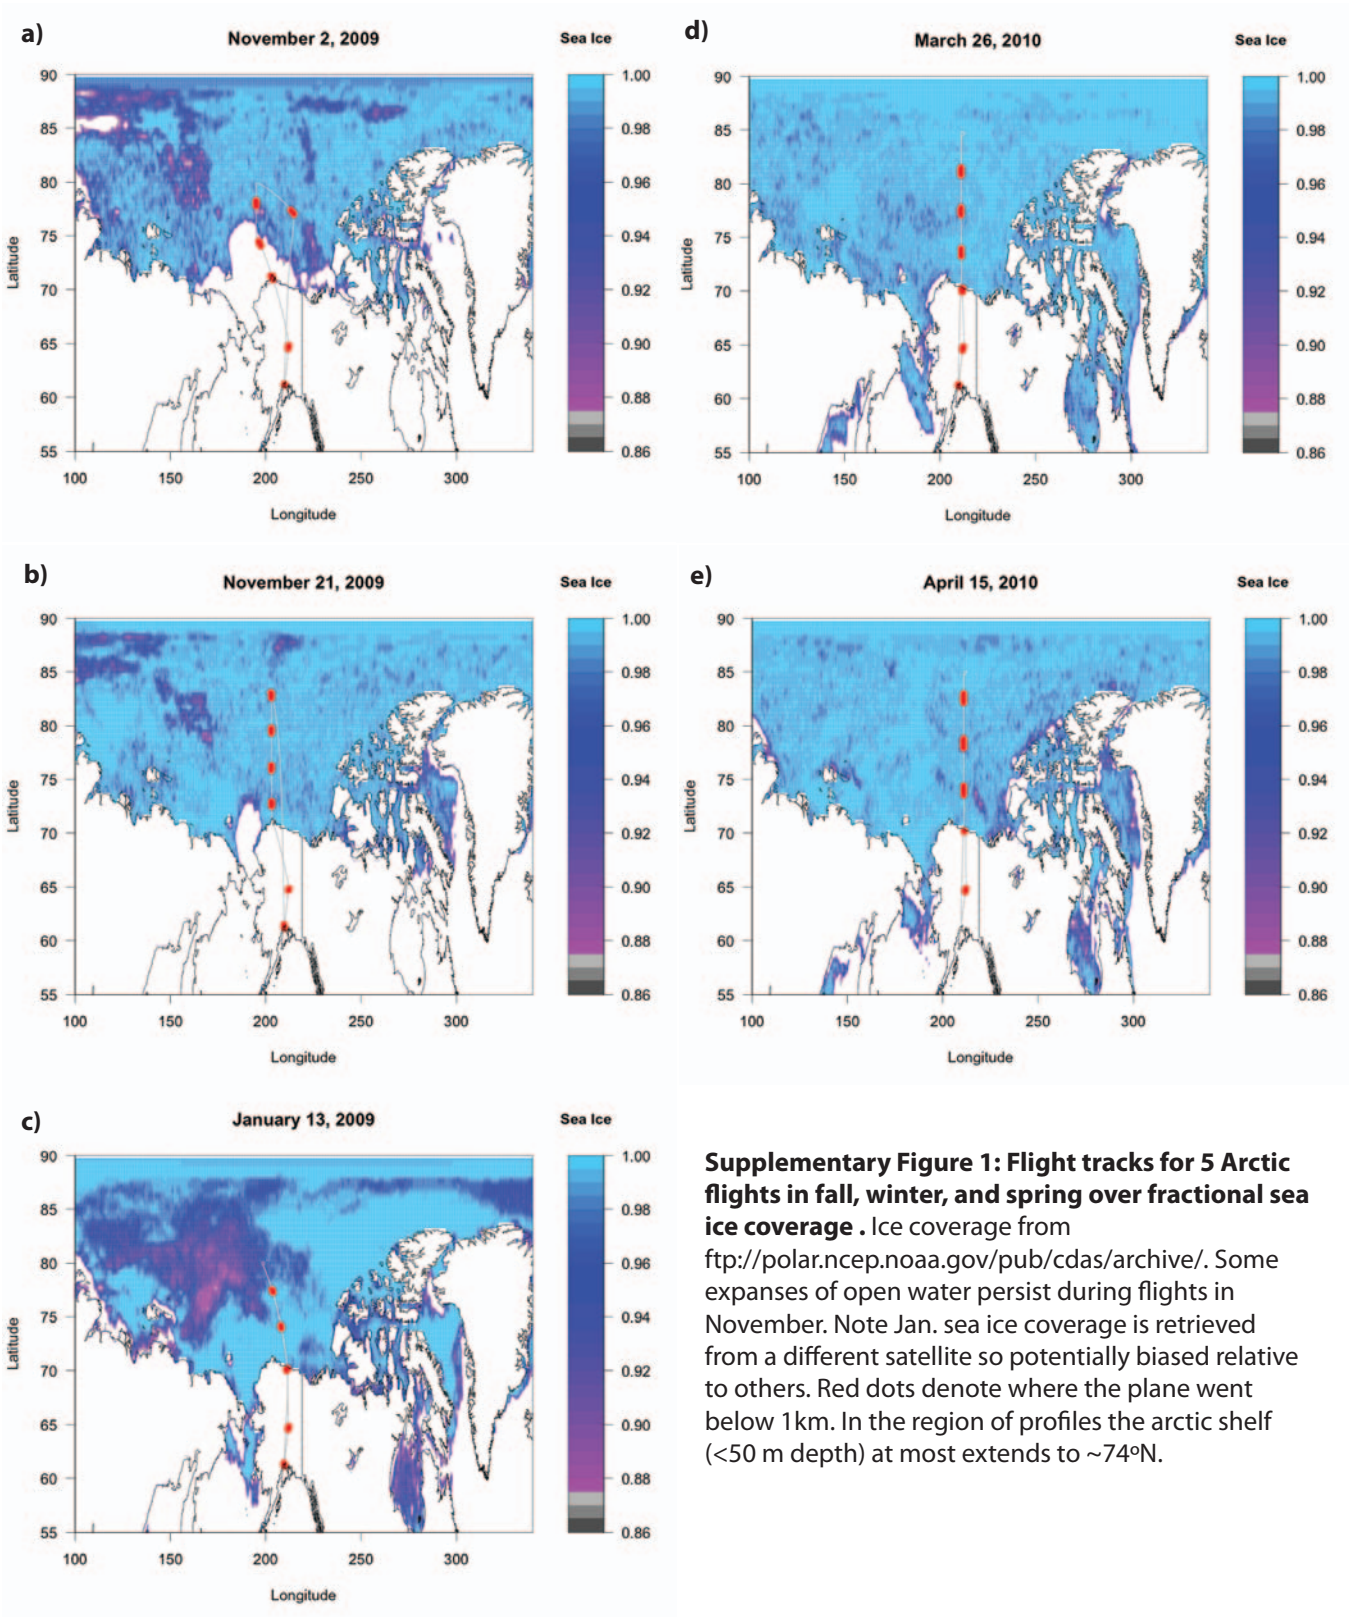

**Supplementary Figure 1: Flight tracks for 5 Arctic flights in fall, winter, and spring over fractional sea ice coverage .** Ice coverage from <ftp://polar.ncep.noaa.gov/pub/cdas/archive/>. Some expanses of open water persist during flights in November. Note Jan. sea ice coverage is retrieved from a different satellite so potentially biased relative to others. Red dots denote where the plane went below 1km. In the region of profiles the arctic shelf (<50 m depth) at most extends to ~74°N.

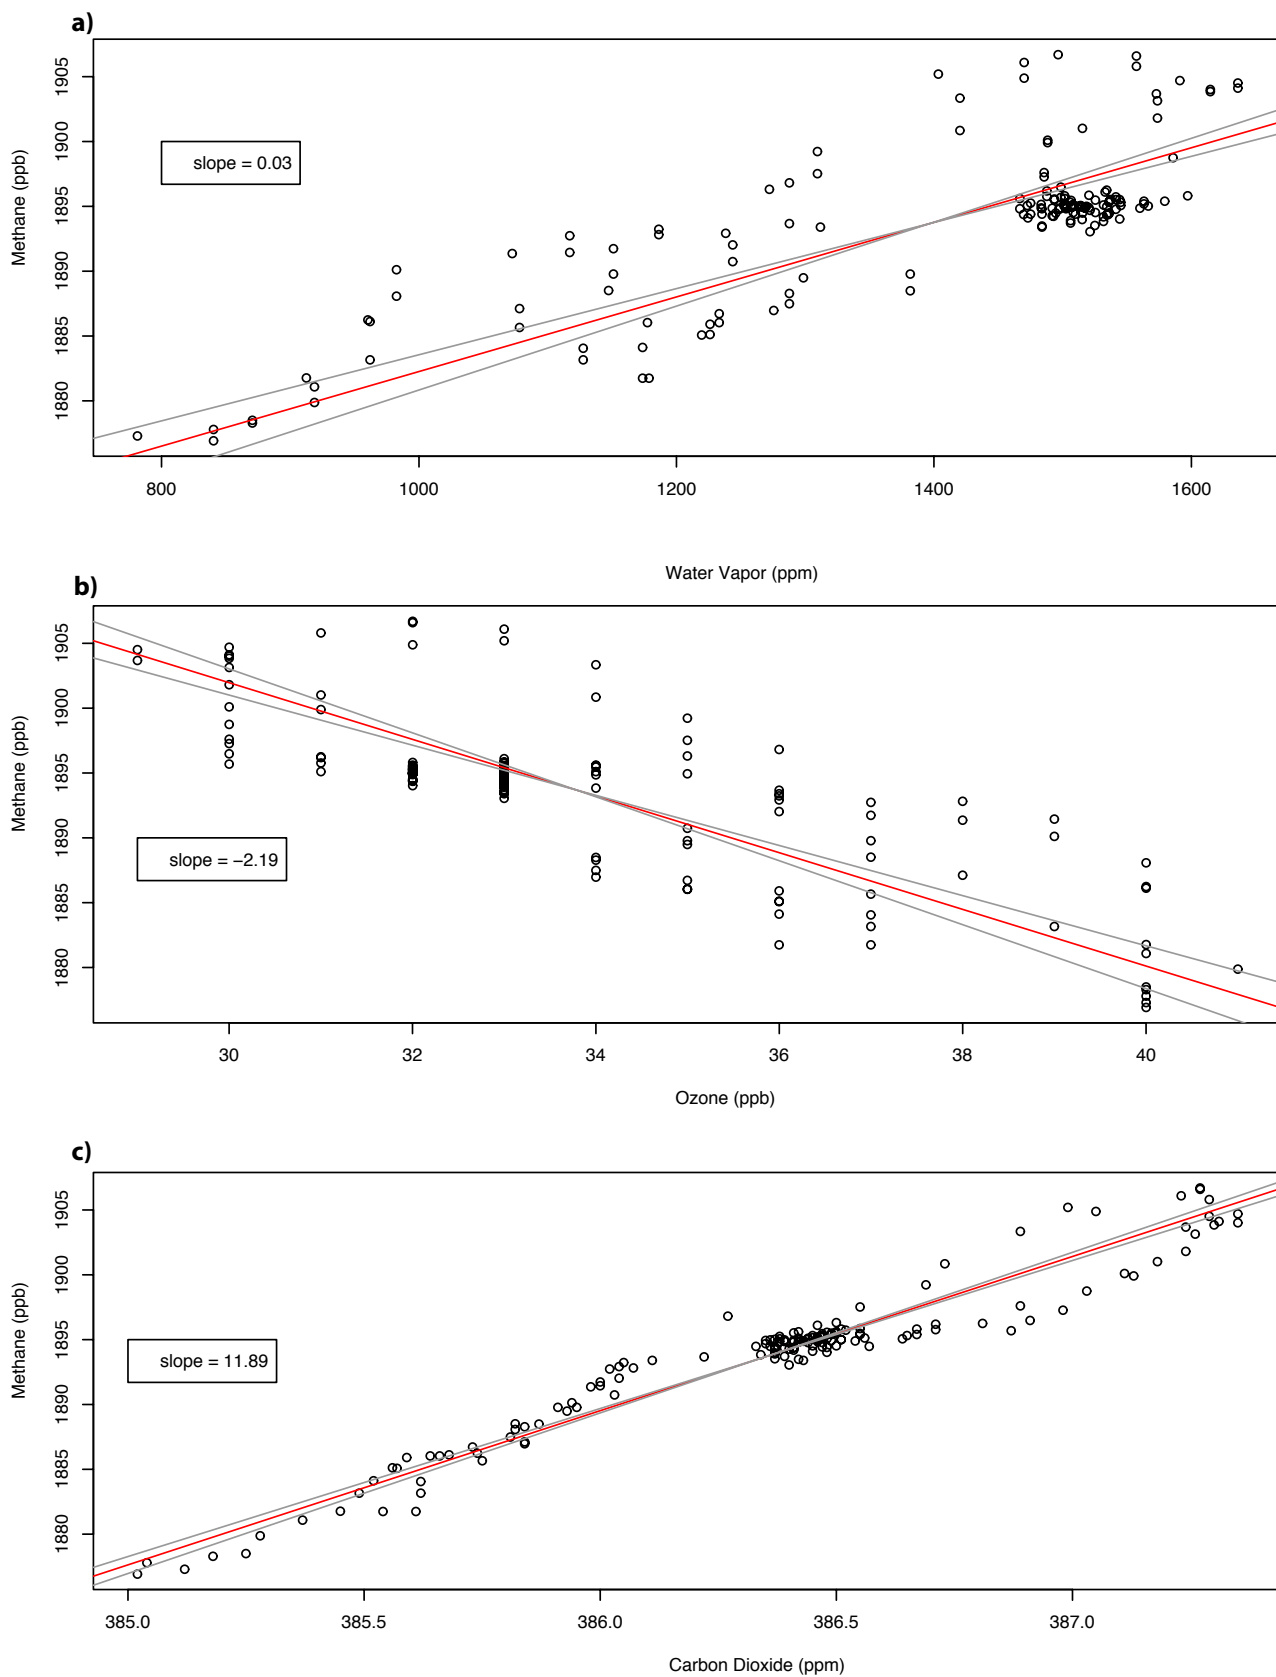

**Supplementary Figure 2: Multi-species correlations.** Data from below 600 m for a profile observed on Nov. 2, 2009 at 78° N.

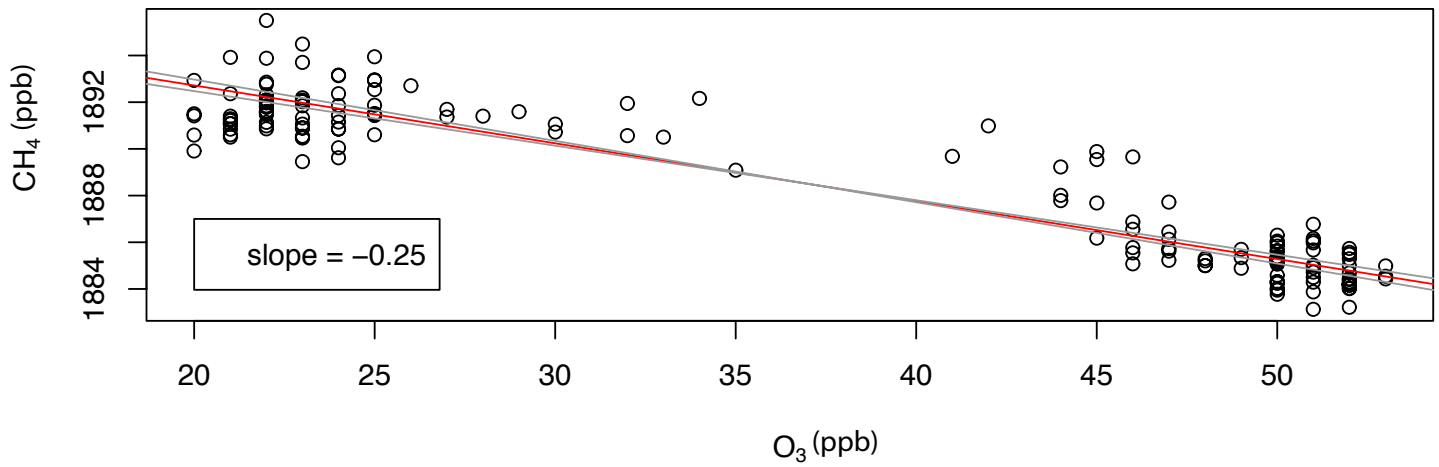

**Supplementary Figure 3: CH<sub>4</sub>:O<sub>3</sub> relations.** Data from below 200 m in spring for profile displayed in fig. 2d.

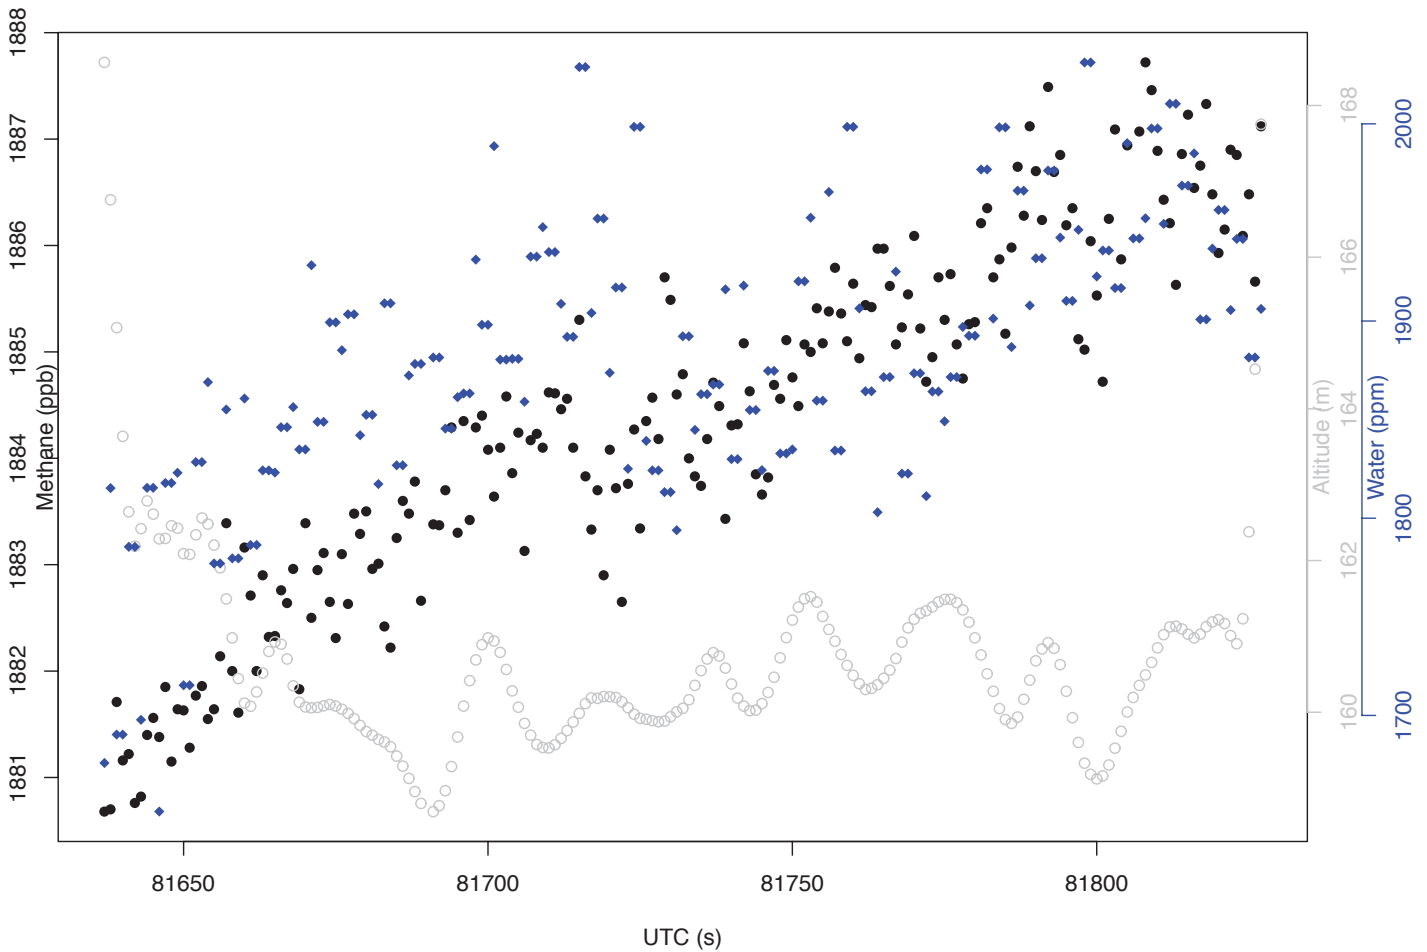

**Supplementary Figure 4: Time-series of methane (black) and water vapor (blue) observations at 79.6°N.** The notable, correlated variability is indicative of a nearby common source.

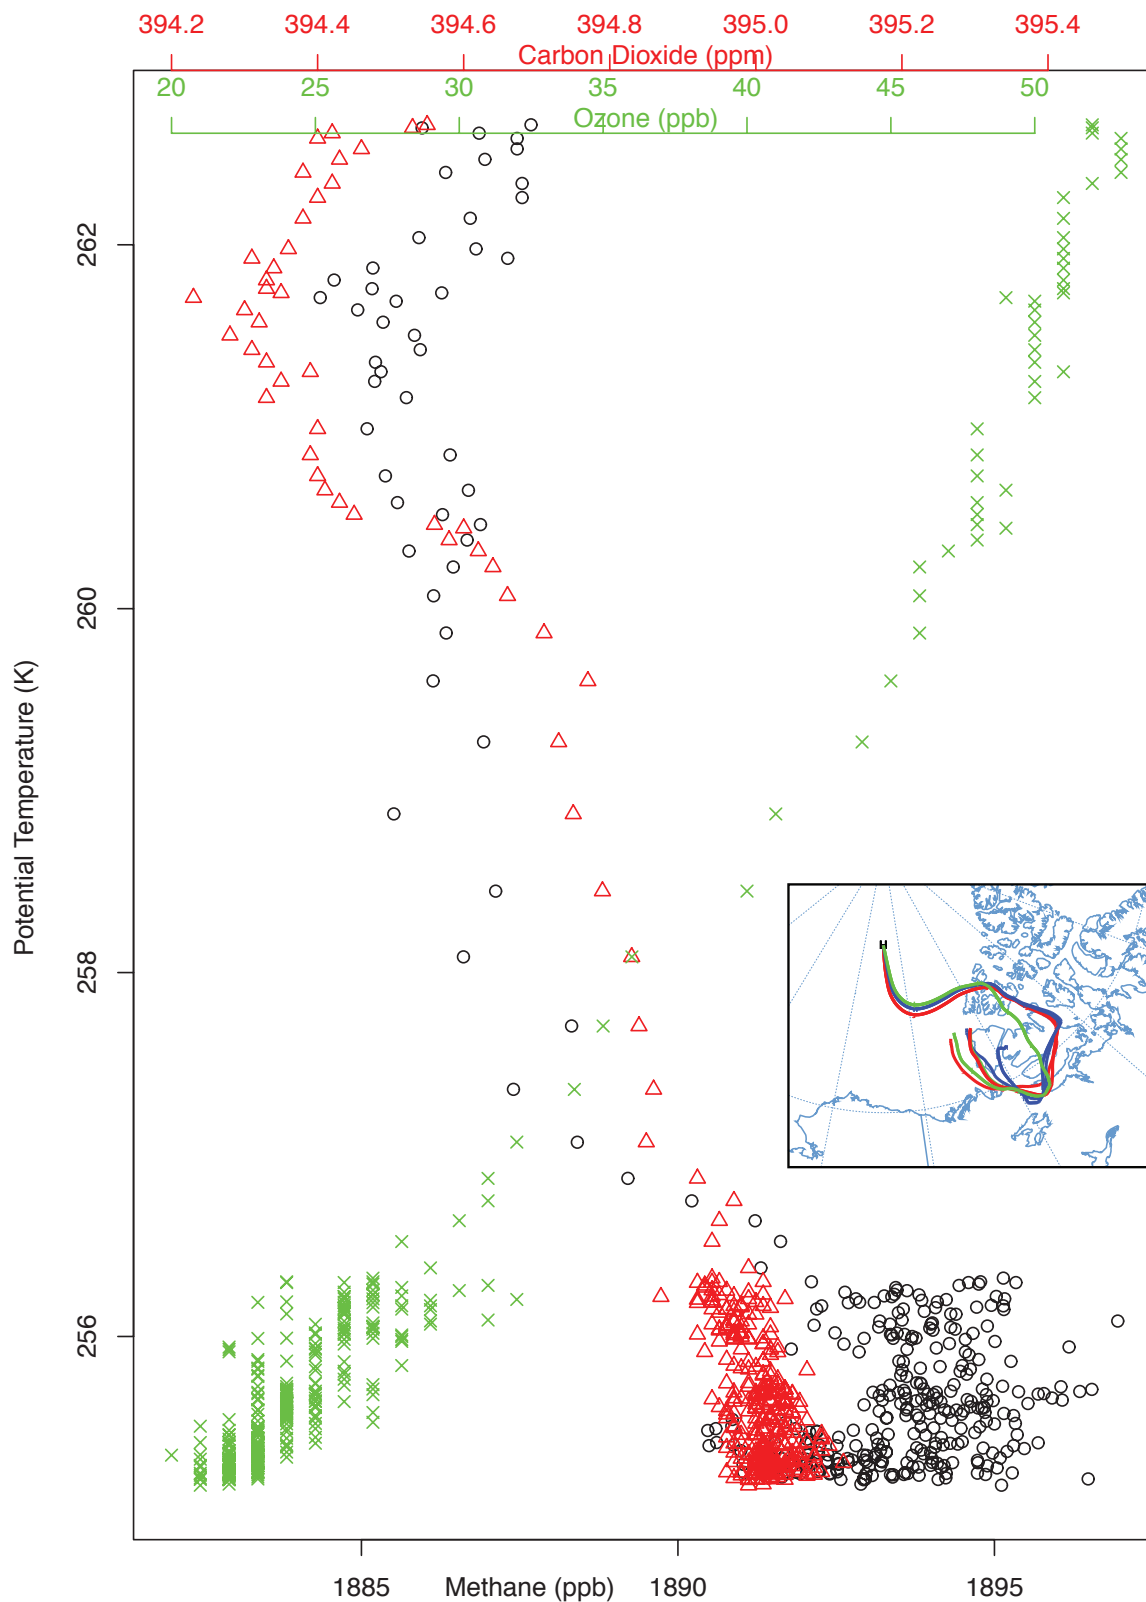

**Supplementary Figure 5: 1-hz observation from profile at 82°N on April 15, 2010 (fig. 3d).** Notice the variability in the enhanced methane at lower theta values, and the correlation with other trace gases, indicative of a local source. Inset shows HYSPLIT back trajectories (8 days) demonstrating this air mass does not originate in an anthropogenic source region.

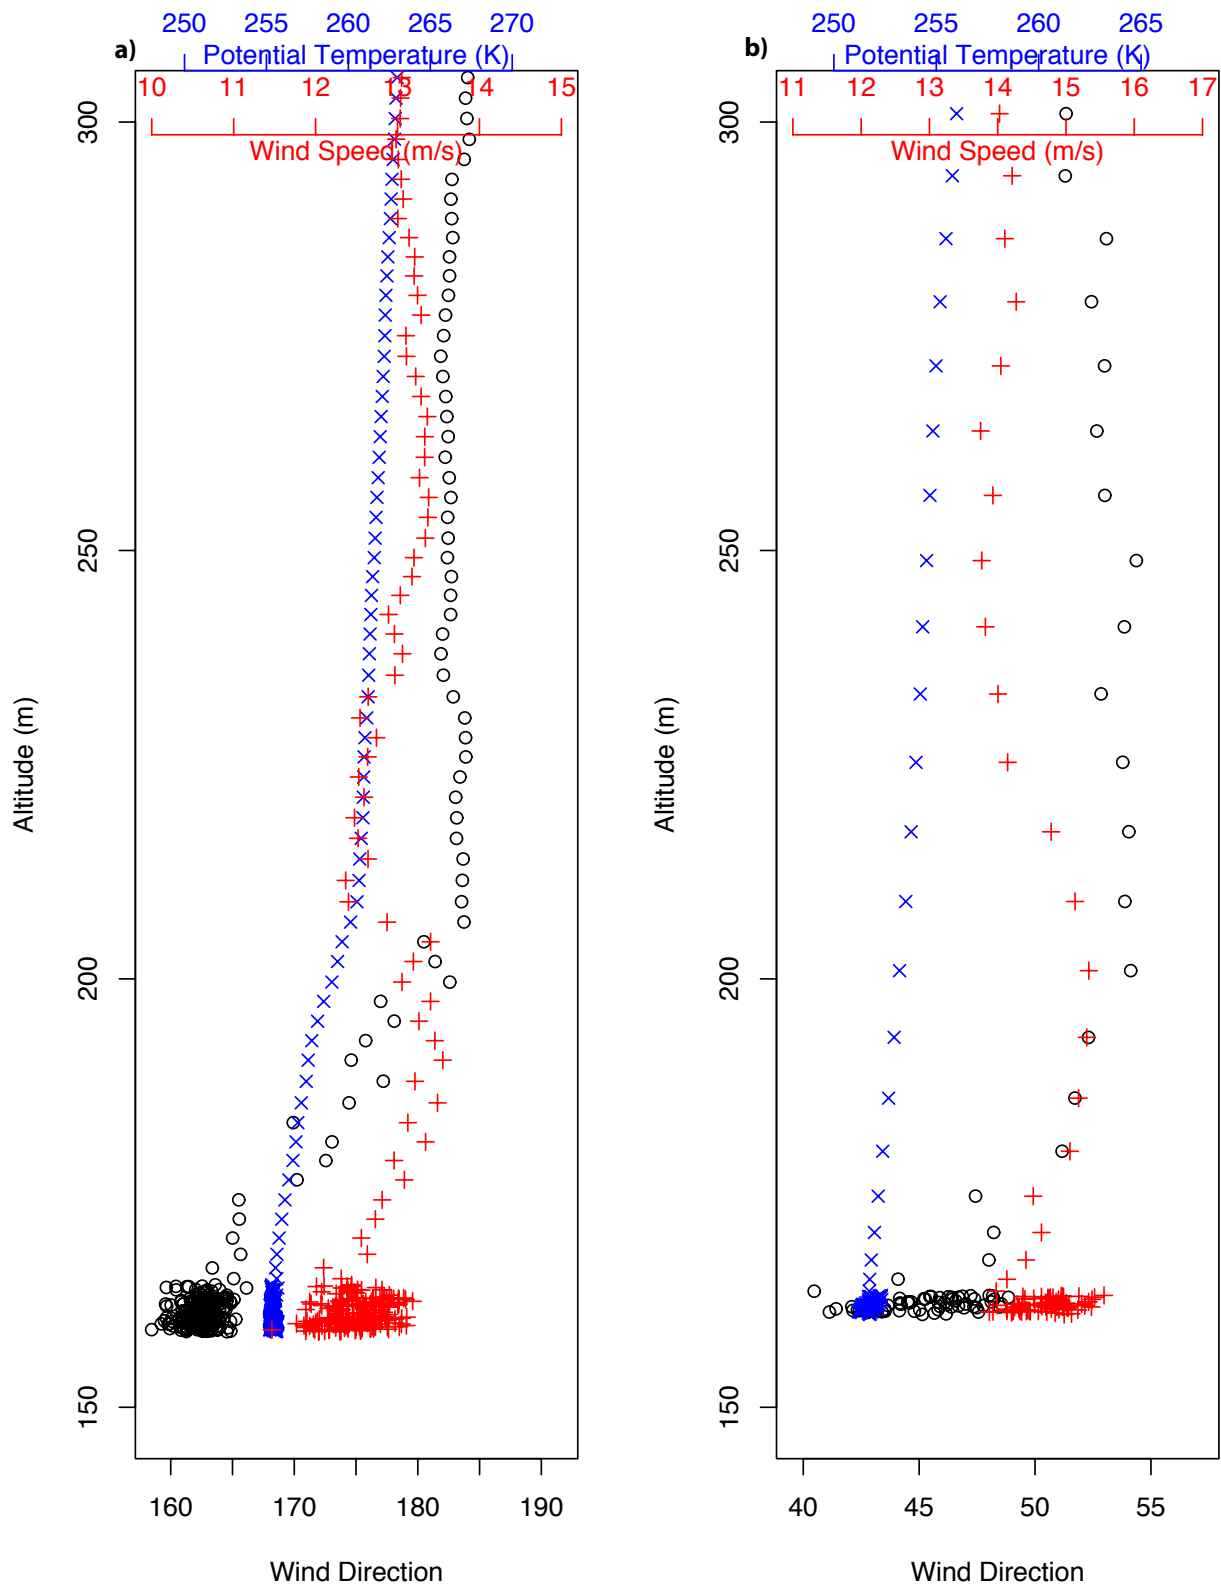

**Supplementary Figure 6: Meteorological parameters.** These match profiles shown in fig. 2b (a) and fig. 2d (b), evidence of an Ekman spiral up to ~200 m.
